# Supplementary material
Source: PubMed Central journal article supplement (PMC3102440)
Supplement: jp200776t_si_001.pdf [file jp200776t_si_001.pdf]

## Supplementary Information for Sahai and Biggin.

**Table SI-1.** Basis Set Superimposition Error (BSSE) energies for water and ligand fragments in each QM system kcal mol<sup>-1</sup>. Fragments are defined as follows: WX; waters where X is 1-5 or A or G as described in Figure 2 of the main manuscript. Ws; all other waters (eg. for the W1-Ws cell for 1FTJ-Glu, Ws would mean W2, W3, W4, W5 and WG), L; ligand (AMPA or Glu), P; protein, LP; ligand and protein, WsL; waters and ligand, WsP; waters and protein, WsLP; waters and ligand and protein.

| Fragment         | Ws   | L    | P     | LP   | WsL  | WsP    | WsLP  |
|------------------|------|------|-------|------|------|--------|-------|
| <b>1FTJ-GLU</b>  |      |      |       |      |      |        |       |
| W1               | 0.00 | 0.61 | 6.47  | 6.53 | 0.60 | 6.48   | 15.47 |
| W2               | 2.28 | 0.12 | 8.05  | 9.35 | 3.17 | 8.66   | 9.41  |
| W3               | 0.73 | 0.14 | 8.86  | 9.16 | 0.86 | 9.06   | 8.92  |
| W4               | 0.00 | 0.77 | 9.33  | 8.72 | 0.72 | 9.28   | 8.67  |
| W5               | 0.08 | 1.97 | 8.06  | 8.12 | 1.81 | 7.88   | 8.11  |
| WG               | 1.75 | 4.51 | 6.18  | 6.07 | 6.15 | 7.16   | 7.53  |
| L                | -    | -    | -     | -    | -    | 32.18  | -     |
| <b>1FTJ-AMPA</b> |      |      |       |      |      |        |       |
| W1               | -    | -    | -     | -    | -    | -      | -     |
| W2               | 2.21 | 1.09 | 6.63  | 7.60 | 2.87 | 7.77   | 8.71  |
| W3               | 0.65 | 1.49 | 6.58  | 7.63 | 2.03 | 8.10   | 7.95  |
| W4               | 0.00 | 0.55 | 10.22 | 9.32 | 0.53 | 10.01  | 9.28  |
| W5               | 0.03 | 2.24 | 7.77  | 8.31 | 2.06 | 7.69   | 8.17  |
| WG               | 1.59 | 1.49 | 4.26  | 5.39 | 3.02 | 4.31   | 6.67  |
| L                | -    | -    | -     | -    | -    | 89.40  | -     |
| <b>1FTM-AMPA</b> |      |      |       |      |      |        |       |
| W1               | 0.00 | 0.59 | 16.42 | 3.24 | 0.40 | -15.17 | 10.76 |
| W2               | 0.00 | 0.68 | 8.39  | 9.64 | 0.61 | 8.79   | 9.72  |
| W3               | 0.12 | 3.09 | 7.32  | 7.94 | 2.57 | 12.24  | 7.62  |
| W4               | 0.00 | 0.14 | 8.41  | 7.24 | 0.13 | 8.24   | 7.16  |
| W5               | 1.57 | 0.14 | 7.17  | 7.27 | 2.49 | 7.84   | 8.01  |
| WG               | 1.74 | 5.72 | 6.55  | 8.85 | 6.54 | 7.40   | 9.46  |
| L                | -    | -    | -     | -    | -    | 38.97  | -     |
| <b>1FTM-GLU</b>  |      |      |       |      |      |        |       |
| W1               | 0.01 | 0.35 | 5.98  | 5.91 | 0.33 | 8.90   | 13.85 |
| W2               | 0.05 | 0.29 | 7.55  | 7.95 | 0.32 | 8.10   | 8.04  |
| W3               | 0.20 | 2.78 | 7.32  | 8.13 | 2.37 | 7.39   | 7.95  |
| W4               | 0.01 | 1.13 | 8.51  | 7.63 | 0.94 | 8.24   | 7.60  |
| W5               | 1.57 | 0.09 | 7.71  | 7.69 | 2.51 | 11.86  | 8.57  |
| WG               | 1.78 | 5.07 | 6.35  | 8.28 | 6.28 | 7.20   | 9.08  |
| L                | -    | -    | -     | -    | -    | 41.79  | -     |
